# Supplementary material
Source: PubMed Central journal article supplement (PMC7954143)
Supplement: NIHMS1546364-supplement-Supp_1.pdf [file NIHMS1546364-supplement-Supp_1.pdf]

**Supplemental Material for**  
**“Optimal Designs of Two-Phase Studies”**

Tao et al.

Table S1. Empirical Bias of  $\hat{\beta}$  in Linear Regression With a Discrete Expensive Covariate

| $p_0$ | $p_1$ | $\beta$ | $\gamma$ | SRS   | ODS    | RDS   | OPT    |       |
|-------|-------|---------|----------|-------|--------|-------|--------|-------|
| 0.7   | 0.7   | 0.0     | 0.0      | 0.000 | 0.001  | 0.000 | 0.000  |       |
|       |       |         | 0.5      | 0.000 | 0.000  | 0.000 | 0.000  |       |
|       |       |         | 1.0      | 0.000 | 0.000  | 0.000 | 0.000  |       |
|       |       | 0.3     | 0.0      | 0.0   | 0.001  | 0.003 | 0.003  | 0.003 |
|       |       |         |          | 0.5   | 0.001  | 0.004 | 0.003  | 0.003 |
|       |       |         |          | 1.0   | 0.001  | 0.003 | 0.003  | 0.003 |
|       |       |         | 0.5      | 0.0   | 0.002  | 0.004 | 0.004  | 0.004 |
|       |       |         |          | 0.5   | 0.002  | 0.005 | 0.004  | 0.004 |
|       |       |         |          | 1.0   | 0.002  | 0.007 | 0.004  | 0.004 |
| 0.5   | 0.9   | 0.0     | 0.0      | 0.000 | 0.000  | 0.000 | 0.000  |       |
|       |       |         | 0.5      | 0.000 | 0.000  | 0.000 | 0.000  |       |
|       |       |         | 1.0      | 0.000 | -0.001 | 0.000 | 0.000  |       |
|       |       | 0.3     | 0.0      | 0.0   | -0.001 | 0.002 | 0.002  | 0.001 |
|       |       |         |          | 0.5   | -0.001 | 0.004 | 0.002  | 0.001 |
|       |       |         |          | 1.0   | -0.001 | 0.003 | 0.002  | 0.001 |
|       |       |         | 0.5      | 0.0   | -0.001 | 0.004 | 0.004  | 0.002 |
|       |       |         |          | 0.5   | -0.001 | 0.006 | 0.004  | 0.002 |
|       |       |         |          | 1.0   | -0.001 | 0.006 | 0.004  | 0.002 |
| 0.1   | 0.5   | 0.0     | 0.0      | 0.001 | 0.000  | 0.000 | -0.001 |       |
|       |       |         | 0.5      | 0.001 | -0.001 | 0.000 | -0.001 |       |
|       |       |         | 1.0      | 0.001 | -0.002 | 0.000 | -0.001 |       |
|       |       | 0.3     | 0.0      | 0.0   | 0.000  | 0.002 | 0.002  | 0.000 |
|       |       |         |          | 0.5   | 0.000  | 0.002 | 0.002  | 0.000 |
|       |       |         |          | 1.0   | 0.000  | 0.003 | 0.002  | 0.000 |
|       |       |         | 0.5      | 0.0   | 0.001  | 0.004 | 0.003  | 0.001 |
|       |       |         |          | 0.5   | 0.001  | 0.004 | 0.003  | 0.001 |
|       |       |         |          | 1.0   | 0.001  | 0.006 | 0.003  | 0.001 |

NOTE: SRS, ODS, RDS, and OPT denote simple random sampling, outcome-dependent sampling, residual-dependent sampling, and optimal design, respectively. Each entry is based on 10,000 replicates.

Table S2. Empirical Bias of  $\hat{\beta}$  in Linear Regression With a Continuous Expensive Covariate

| $Z$       | $\kappa$   | $\beta$ | $\gamma$ | SRS    | Without a simple random sample |       |        | With a simple random sample |        |        |        |        |        |       |
|-----------|------------|---------|----------|--------|--------------------------------|-------|--------|-----------------------------|--------|--------|--------|--------|--------|-------|
|           |            |         |          |        | ODS                            | RDS   | OPT    | ODS                         | RDS    | PDS    | OPT    |        |        |       |
| Bern(0.5) | 0.0        | 0.0     | 0.0      | 0.000  | 0.000                          | 0.000 | 0.000  | 0.000                       | 0.000  | 0.000  | 0.000  | 0.000  |        |       |
|           |            |         | 0.5      | 0.000  | 0.000                          | 0.000 | 0.000  | 0.000                       | 0.000  | 0.000  | 0.000  | 0.000  |        |       |
|           |            |         | 1.0      | 0.000  | 0.000                          | 0.000 | 0.000  | 0.000                       | 0.000  | 0.000  | 0.000  | 0.000  |        |       |
|           |            | 0.3     | 0.0      | 0.001  | 0.002                          | 0.002 | 0.002  | 0.002                       | 0.002  | 0.002  | 0.002  | -0.003 | 0.002  |       |
|           |            |         | 0.5      | 0.001  | 0.003                          | 0.002 | 0.002  | 0.002                       | 0.002  | 0.002  | 0.002  | -0.003 | 0.002  |       |
|           |            |         | 1.0      | 0.001  | 0.004                          | 0.002 | 0.002  | 0.002                       | 0.002  | 0.002  | 0.002  | -0.003 | 0.002  |       |
|           |            | 0.5     | 0.0      | 0.002  | 0.005                          | 0.005 | 0.005  | 0.005                       | 0.003  | 0.003  | 0.003  | 0.000  | 0.003  |       |
|           |            |         | 0.5      | 0.002  | 0.006                          | 0.005 | 0.005  | 0.005                       | 0.003  | 0.003  | 0.003  | 0.000  | 0.003  |       |
|           |            |         | 1.0      | 0.002  | 0.007                          | 0.005 | 0.005  | 0.005                       | 0.003  | 0.003  | 0.003  | 0.000  | 0.003  |       |
|           | -0.7       | 0.0     | 0.0      | -0.001 | 0.000                          | 0.000 | 0.000  | -0.001                      | -0.001 | -0.001 | 0.000  | -0.001 |        |       |
|           |            |         | 0.5      | -0.001 | 0.000                          | 0.000 | -0.001 | -0.001                      | -0.001 | -0.001 | 0.000  | -0.001 |        |       |
|           |            |         | 1.0      | -0.001 | 0.000                          | 0.000 | -0.001 | -0.001                      | -0.001 | -0.001 | 0.000  | -0.001 |        |       |
|           |            | 0.3     | 0.0      | 0.000  | 0.002                          | 0.002 | 0.002  | 0.002                       | 0.002  | 0.002  | 0.002  | -0.002 | 0.001  |       |
|           |            |         | 0.5      | 0.000  | 0.003                          | 0.002 | 0.002  | 0.002                       | 0.002  | 0.002  | 0.002  | -0.002 | 0.001  |       |
|           |            |         | 1.0      | 0.000  | 0.003                          | 0.002 | 0.002  | 0.002                       | 0.002  | 0.002  | 0.002  | -0.002 | 0.001  |       |
|           |            | 0.5     | 0.0      | 0.002  | 0.004                          | 0.004 | 0.003  | 0.003                       | 0.003  | 0.003  | 0.003  | 0.002  | 0.002  |       |
|           |            |         | 0.5      | 0.002  | 0.005                          | 0.004 | 0.003  | 0.003                       | 0.003  | 0.003  | 0.003  | 0.002  | 0.002  |       |
|           |            |         | 1.0      | 0.002  | 0.006                          | 0.004 | 0.003  | 0.003                       | 0.003  | 0.003  | 0.003  | 0.002  | 0.002  |       |
|           | Unif(0, 1) | 0.0     | 0.0      | 0.0    | -0.001                         | 0.000 | 0.000  | 0.000                       | 0.000  | 0.000  | 0.000  | -0.001 | 0.000  |       |
|           |            |         |          | 0.5    | -0.001                         | 0.000 | 0.000  | 0.000                       | 0.000  | 0.000  | 0.000  | 0.000  | -0.001 | 0.000 |
|           |            |         |          | 1.0    | -0.001                         | 0.000 | 0.000  | 0.000                       | 0.000  | 0.000  | 0.000  | 0.000  | -0.001 | 0.000 |
|           |            |         | 0.3      | 0.0    | 0.000                          | 0.002 | 0.002  | 0.002                       | 0.002  | 0.002  | 0.002  | 0.002  | -0.004 | 0.002 |
|           |            |         |          | 0.5    | 0.000                          | 0.002 | 0.002  | 0.002                       | 0.002  | 0.002  | 0.002  | 0.002  | -0.004 | 0.002 |
|           |            |         |          | 1.0    | 0.000                          | 0.003 | 0.002  | 0.002                       | 0.002  | 0.002  | 0.002  | 0.002  | -0.004 | 0.002 |
| 0.5       |            |         | 0.0      | 0.002  | 0.005                          | 0.005 | 0.005  | 0.005                       | 0.003  | 0.003  | 0.003  | 0.000  | 0.003  |       |
|           |            |         | 0.5      | 0.002  | 0.005                          | 0.005 | 0.005  | 0.005                       | 0.003  | 0.003  | 0.003  | 0.000  | 0.003  |       |
|           |            |         | 1.0      | 0.002  | 0.005                          | 0.005 | 0.005  | 0.005                       | 0.003  | 0.003  | 0.003  | 0.000  | 0.003  |       |
| -0.7      |            | 0.0     | 0.0      | -0.001 | 0.000                          | 0.000 | 0.000  | 0.000                       | -0.001 | -0.001 | -0.001 | -0.001 |        |       |
|           |            |         | 0.5      | -0.001 | 0.000                          | 0.000 | 0.000  | 0.000                       | -0.001 | -0.001 | -0.001 | -0.001 |        |       |
|           |            |         | 1.0      | -0.001 | 0.000                          | 0.000 | 0.000  | 0.000                       | -0.001 | -0.001 | -0.001 | -0.001 |        |       |
|           |            | 0.3     | 0.0      | 0.000  | 0.002                          | 0.002 | 0.002  | 0.002                       | 0.002  | 0.002  | 0.002  | -0.008 | 0.002  |       |
|           |            |         | 0.5      | 0.000  | 0.002                          | 0.002 | 0.002  | 0.002                       | 0.002  | 0.002  | 0.002  | -0.008 | 0.002  |       |
|           |            |         | 1.0      | 0.000  | 0.003                          | 0.002 | 0.002  | 0.002                       | 0.002  | 0.002  | 0.002  | -0.008 | 0.002  |       |
|           |            | 0.5     | 0.0      | 0.004  | 0.004                          | 0.004 | 0.003  | 0.003                       | 0.003  | 0.003  | 0.003  | -0.001 | 0.003  |       |
|           |            |         | 0.5      | 0.004  | 0.004                          | 0.004 | 0.003  | 0.003                       | 0.003  | 0.003  | 0.003  | -0.001 | 0.003  |       |
|           |            |         | 1.0      | 0.004  | 0.005                          | 0.004 | 0.003  | 0.003                       | 0.003  | 0.003  | 0.003  | -0.001 | 0.003  |       |

NOTE: SRS, ODS, RDS, PDS, and OPT denote simple random sampling, outcome-dependent sampling, residual-dependent sampling, probability-dependent sampling, and optimal design, respectively. Each entry is based on 10,000 replicates.

Table S3. Empirical Standard Error of  $\hat{\beta}$  in Linear Regression With a Continuous Expensive Covariate

| $Z$       | $\kappa$   | $\beta$ | $\gamma$ | SRS   | Without a simple random sample |       |       | With a simple random sample |       |       |       |       |
|-----------|------------|---------|----------|-------|--------------------------------|-------|-------|-----------------------------|-------|-------|-------|-------|
|           |            |         |          |       | ODS                            | RDS   | OPT   | ODS                         | RDS   | PDS   | OPT   |       |
| Bern(0.5) | 0.0        | 0.0     | 0.0      | 0.051 | 0.024                          | 0.024 | 0.024 | 0.028                       | 0.028 | 0.033 | 0.028 |       |
|           |            |         | 0.5      | 0.051 | 0.027                          | 0.024 | 0.024 | 0.030                       | 0.028 | 0.033 | 0.028 |       |
|           |            |         | 1.0      | 0.051 | 0.037                          | 0.024 | 0.024 | 0.035                       | 0.028 | 0.033 | 0.028 |       |
|           |            | 0.3     | 0.0      | 0.047 | 0.030                          | 0.029 | 0.029 | 0.031                       | 0.031 | 0.034 | 0.031 |       |
|           |            |         | 0.5      | 0.047 | 0.032                          | 0.029 | 0.029 | 0.033                       | 0.031 | 0.034 | 0.031 |       |
|           |            |         | 1.0      | 0.047 | 0.040                          | 0.029 | 0.029 | 0.036                       | 0.031 | 0.034 | 0.031 |       |
|           |            | 0.5     | 0.0      | 0.043 | 0.038                          | 0.038 | 0.038 | 0.035                       | 0.035 | 0.036 | 0.035 |       |
|           |            |         | 0.5      | 0.043 | 0.041                          | 0.038 | 0.038 | 0.036                       | 0.035 | 0.036 | 0.035 |       |
|           |            |         | 1.0      | 0.043 | 0.047                          | 0.038 | 0.038 | 0.038                       | 0.035 | 0.036 | 0.035 |       |
|           | -0.7       | 0.0     | 0.0      | 0.063 | 0.030                          | 0.030 | 0.028 | 0.035                       | 0.035 | 0.040 | 0.032 |       |
|           |            |         | 0.5      | 0.063 | 0.034                          | 0.030 | 0.028 | 0.038                       | 0.035 | 0.040 | 0.032 |       |
|           |            |         | 1.0      | 0.063 | 0.046                          | 0.030 | 0.028 | 0.043                       | 0.035 | 0.040 | 0.032 |       |
|           |            | 0.3     | 0.0      | 0.055 | 0.035                          | 0.035 | 0.032 | 0.037                       | 0.037 | 0.039 | 0.036 |       |
|           |            |         | 0.5      | 0.055 | 0.038                          | 0.035 | 0.032 | 0.039                       | 0.037 | 0.039 | 0.036 |       |
|           |            |         | 1.0      | 0.055 | 0.047                          | 0.035 | 0.032 | 0.043                       | 0.037 | 0.039 | 0.036 |       |
|           |            | 0.5     | 0.0      | 0.049 | 0.041                          | 0.041 | 0.038 | 0.040                       | 0.040 | 0.041 | 0.040 |       |
|           |            |         | 0.5      | 0.049 | 0.044                          | 0.041 | 0.038 | 0.042                       | 0.040 | 0.041 | 0.040 |       |
|           |            |         | 1.0      | 0.049 | 0.052                          | 0.041 | 0.038 | 0.044                       | 0.040 | 0.041 | 0.040 |       |
|           | Unif(0, 1) | 0.0     | 0.0      | 0.0   | 0.054                          | 0.025 | 0.025 | 0.025                       | 0.029 | 0.029 | 0.039 | 0.029 |
|           |            |         |          | 0.5   | 0.054                          | 0.025 | 0.025 | 0.025                       | 0.030 | 0.029 | 0.039 | 0.029 |
|           |            |         |          | 1.0   | 0.054                          | 0.028 | 0.025 | 0.025                       | 0.031 | 0.029 | 0.039 | 0.029 |
| 0.3       |            |         | 0.0      | 0.050 | 0.030                          | 0.030 | 0.030 | 0.032                       | 0.032 | 0.035 | 0.032 |       |
|           |            |         | 0.5      | 0.050 | 0.031                          | 0.030 | 0.030 | 0.032                       | 0.032 | 0.035 | 0.032 |       |
|           |            |         | 1.0      | 0.050 | 0.033                          | 0.030 | 0.030 | 0.034                       | 0.032 | 0.035 | 0.032 |       |
| 0.5       |            |         | 0.0      | 0.045 | 0.039                          | 0.039 | 0.039 | 0.036                       | 0.036 | 0.037 | 0.036 |       |
|           |            |         | 0.5      | 0.045 | 0.040                          | 0.039 | 0.039 | 0.036                       | 0.036 | 0.037 | 0.036 |       |
|           |            |         | 1.0      | 0.045 | 0.042                          | 0.039 | 0.039 | 0.037                       | 0.036 | 0.037 | 0.036 |       |
| -0.7      |            | 0.0     | 0.0      | 0.068 | 0.030                          | 0.030 | 0.030 | 0.036                       | 0.036 | 0.050 | 0.035 |       |
|           |            |         | 0.5      | 0.068 | 0.032                          | 0.030 | 0.030 | 0.037                       | 0.036 | 0.050 | 0.035 |       |
|           |            |         | 1.0      | 0.068 | 0.035                          | 0.030 | 0.030 | 0.039                       | 0.036 | 0.050 | 0.035 |       |
|           |            | 0.3     | 0.0      | 0.062 | 0.035                          | 0.035 | 0.034 | 0.038                       | 0.038 | 0.046 | 0.037 |       |
|           |            |         | 0.5      | 0.062 | 0.036                          | 0.035 | 0.034 | 0.039                       | 0.038 | 0.046 | 0.037 |       |
|           |            |         | 1.0      | 0.062 | 0.039                          | 0.035 | 0.034 | 0.041                       | 0.038 | 0.046 | 0.037 |       |
|           |            | 0.5     | 0.0      | 0.057 | 0.042                          | 0.042 | 0.041 | 0.042                       | 0.042 | 0.044 | 0.042 |       |
|           |            |         | 0.5      | 0.057 | 0.043                          | 0.042 | 0.041 | 0.042                       | 0.042 | 0.044 | 0.042 |       |
|           |            |         | 1.0      | 0.057 | 0.046                          | 0.042 | 0.041 | 0.043                       | 0.042 | 0.044 | 0.042 |       |

NOTE: see the Note to Table S2.

Table S4. Empirical Bias of  $\hat{\beta}$  in Logistic Regression

| $p_0$ | $p_1$ | $\beta$ | $\gamma$ | Common disease |        |        |              |        |        |              |        |        | Rare disease |        |        |        |        |
|-------|-------|---------|----------|----------------|--------|--------|--------------|--------|--------|--------------|--------|--------|--------------|--------|--------|--------|--------|
|       |       |         |          | $E(Z) = 0.3$   |        |        | $E(Z) = 0.5$ |        |        | $E(Z) = 0.7$ |        |        | $E(Z) = 0.1$ |        |        |        |        |
|       |       |         |          | CC             | SCC    | OPT    | CC           | SCC    | OPT    | CC           | SCC    | OPT    | CC           | SCC    | OPT    |        |        |
| 0.7   | 0.7   | 0.0     | 0        | -0.001         | -0.001 | 0.002  | -0.003       | 0.000  | 0.002  | 0.001        | -0.003 | 0.001  | 0.000        | -0.001 | 0.000  |        |        |
|       |       |         |          | 1              | 0.001  | 0.003  | -0.002       | 0.001  | 0.001  | 0.002        | 0.002  | -0.002 | 0.004        | 0.000  | 0.001  | 0.001  |        |
|       |       |         |          | 2              | 0.000  | 0.002  | 0.001        | -0.002 | 0.001  | 0.006        | -0.001 | -0.001 | 0.000        | 0.000  | -0.001 | -0.002 |        |
|       |       |         | 0.3      | 0              | 0.002  | 0.007  | 0.004        | 0.004  | -0.001 | 0.004        | -0.001 | -0.002 | 0.000        | 0.002  | 0.001  | 0.000  |        |
|       |       |         |          | 1              | 0.000  | 0.002  | -0.005       | -0.001 | 0.000  | 0.002        | 0.003  | 0.000  | 0.001        | 0.000  | -0.002 | -0.002 |        |
|       |       |         |          | 2              | 0.005  | 0.000  | -0.002       | -0.001 | 0.000  | 0.000        | 0.000  | 0.000  | -0.002       | 0.001  | 0.002  | 0.001  |        |
|       |       | 0.5     | 0        | 0              | 0.004  | 0.006  | 0.006        | 0.000  | -0.001 | 0.003        | 0.003  | 0.001  | 0.003        | 0.003  | 0.004  | 0.004  |        |
|       |       |         |          | 1              | 0.006  | 0.005  | 0.001        | 0.003  | 0.002  | 0.002        | 0.004  | 0.003  | 0.007        | 0.000  | 0.001  | 0.000  |        |
|       |       |         |          | 2              | 0.006  | 0.003  | -0.001       | 0.001  | 0.000  | 0.004        | -0.001 | -0.002 | 0.005        | 0.003  | 0.001  | 0.002  |        |
|       |       |         | 0.9      | 0.0            | 0      | 0.000  | 0.002        | 0.003  | 0.002  | -0.002       | 0.002  | 0.007  | -0.001       | 0.003  | 0.002  | 0.002  | 0.001  |
|       |       |         |          |                | 1      | -0.001 | -0.001       | 0.004  | -0.002 | 0.001        | -0.001 | 0.000  | -0.001       | 0.000  | -0.001 | -0.003 | -0.001 |
|       |       |         |          |                | 2      | -0.004 | -0.001       | 0.001  | -0.006 | 0.004        | 0.006  | -0.007 | 0.004        | 0.002  | 0.002  | 0.002  | 0.003  |
| 0.5   | 0.3   | 0       | 0        | 0.000          | 0.000  | 0.001  | 0.002        | 0.003  | 0.002  | 0.002        | 0.004  | 0.002  | 0.001        | 0.003  | 0.001  |        |        |
|       |       |         | 1        | -0.001         | 0.003  | 0.003  | 0.001        | -0.001 | 0.003  | 0.000        | 0.002  | -0.001 | 0.000        | 0.001  | 0.002  |        |        |
|       |       |         | 2        | -0.004         | 0.003  | 0.002  | 0.001        | 0.004  | 0.003  | 0.002        | 0.003  | 0.001  | 0.000        | 0.001  | 0.000  |        |        |
|       |       | 0.5     | 0        | 0.008          | 0.003  | 0.003  | 0.001        | 0.003  | 0.001  | 0.007        | 0.006  | 0.002  | 0.001        | 0.003  | 0.001  |        |        |
|       |       |         | 1        | 0.001          | 0.000  | 0.003  | 0.000        | 0.001  | 0.005  | 0.009        | 0.000  | 0.002  | 0.001        | 0.000  | 0.001  |        |        |
|       |       |         | 2        | 0.003          | 0.001  | 0.003  | -0.005       | 0.004  | 0.002  | 0.003        | 0.009  | 0.002  | 0.003        | 0.002  | 0.003  |        |        |
|       | 0.1   | 0.5     | 0.0      | 0              | 0.002  | 0.003  | -0.001       | 0.000  | -0.003 | -0.002       | -0.004 | 0.001  | -0.002       | 0.002  | 0.001  | 0.002  |        |
|       |       |         |          | 1              | -0.002 | 0.002  | 0.003        | -0.002 | 0.001  | -0.002       | -0.001 | 0.001  | -0.002       | 0.003  | 0.000  | 0.001  |        |
|       |       |         |          | 2              | -0.004 | 0.003  | 0.001        | 0.002  | -0.003 | -0.003       | -0.003 | 0.002  | 0.001        | -0.001 | 0.002  | 0.002  |        |
|       |       | 0.3     | 0        | 0.000          | 0.003  | 0.001  | -0.001       | 0.000  | 0.001  | 0.000        | 0.003  | 0.003  | 0.002        | 0.002  | 0.003  |        |        |
|       |       |         | 1        | 0.003          | 0.000  | 0.005  | -0.003       | -0.001 | 0.003  | 0.002        | 0.006  | 0.000  | 0.002        | 0.001  | 0.001  |        |        |
|       |       |         | 2        | -0.001         | 0.000  | 0.003  | -0.002       | 0.003  | 0.001  | 0.001        | 0.001  | -0.003 | 0.000        | 0.000  | 0.000  |        |        |
| 0.5   | 0     | 0.003   | 0.004    | 0.006          | 0.007  | 0.002  | 0.004        | -0.001 | 0.003  | 0.001        | 0.001  | 0.002  | 0.002        |        |        |        |        |
|       | 1     | 0.006   | 0.007    | 0.007          | 0.001  | 0.009  | -0.001       | 0.003  | 0.003  | 0.004        | 0.005  | 0.003  | 0.001        |        |        |        |        |
|       | 2     | 0.003   | 0.005    | 0.000          | 0.000  | 0.002  | -0.003       | 0.001  | 0.004  | 0.001        | 0.001  | 0.004  | 0.003        |        |        |        |        |

NOTE: CC, SCC, and OPT denote case-control sampling, stratified case-control sampling, and optimal design, respectively. Each entry is based on 10,000 replicates.

Table S5. Empirical Standard Error of  $\hat{\beta}$  in Logistic Regression

| $p_0$ | $p_1$ | $\beta$ | $\gamma$ | Common disease |       |       |            |       |       |            |       |       | Rare disease |       |       |       |       |
|-------|-------|---------|----------|----------------|-------|-------|------------|-------|-------|------------|-------|-------|--------------|-------|-------|-------|-------|
|       |       |         |          | E(Z) = 0.3     |       |       | E(Z) = 0.5 |       |       | E(Z) = 0.7 |       |       | E(Z) = 0.1   |       |       |       |       |
|       |       |         |          | CC             | SCC   | OPT   | CC         | SCC   | OPT   | CC         | SCC   | OPT   | CC           | SCC   | OPT   |       |       |
| 0.7   | 0.7   | 0.0     | 0        | 0.218          | 0.220 | 0.218 | 0.220      | 0.217 | 0.215 | 0.218      | 0.221 | 0.219 | 0.132        | 0.133 | 0.133 |       |       |
|       |       |         | 1        | 0.224          | 0.219 | 0.219 | 0.229      | 0.221 | 0.218 | 0.225      | 0.223 | 0.218 | 0.133        | 0.130 | 0.130 |       |       |
|       |       |         | 2        | 0.245          | 0.221 | 0.217 | 0.246      | 0.216 | 0.217 | 0.238      | 0.219 | 0.218 | 0.141        | 0.130 | 0.130 |       |       |
|       |       | 0.3     | 0        | 0.223          | 0.227 | 0.222 | 0.226      | 0.222 | 0.221 | 0.224      | 0.227 | 0.224 | 0.136        | 0.135 | 0.134 |       |       |
|       |       |         | 1        | 0.230          | 0.225 | 0.222 | 0.231      | 0.221 | 0.223 | 0.229      | 0.224 | 0.226 | 0.136        | 0.132 | 0.133 |       |       |
|       |       |         | 2        | 0.249          | 0.224 | 0.220 | 0.248      | 0.224 | 0.221 | 0.241      | 0.223 | 0.221 | 0.145        | 0.134 | 0.133 |       |       |
|       |       | 0.5     | 0        | 0.229          | 0.230 | 0.228 | 0.229      | 0.227 | 0.229 | 0.230      | 0.229 | 0.226 | 0.137        | 0.137 | 0.138 |       |       |
|       |       |         | 1        | 0.236          | 0.227 | 0.225 | 0.234      | 0.228 | 0.226 | 0.233      | 0.228 | 0.225 | 0.140        | 0.137 | 0.138 |       |       |
|       |       |         | 2        | 0.255          | 0.226 | 0.221 | 0.253      | 0.229 | 0.226 | 0.243      | 0.228 | 0.226 | 0.146        | 0.137 | 0.138 |       |       |
|       |       | 0.5     | 0.9      | 0.0            | 0     | 0.223 | 0.244      | 0.204 | 0.245 | 0.242      | 0.203 | 0.271 | 0.242        | 0.204 | 0.123 | 0.125 | 0.122 |
|       |       |         |          |                | 1     | 0.233 | 0.245      | 0.205 | 0.262 | 0.244      | 0.203 | 0.294 | 0.245        | 0.206 | 0.127 | 0.127 | 0.121 |
|       |       |         |          |                | 2     | 0.255 | 0.243      | 0.199 | 0.300 | 0.240      | 0.203 | 0.321 | 0.245        | 0.203 | 0.132 | 0.135 | 0.126 |
| 0.3   | 0     |         |          | 0.224          | 0.245 | 0.205 | 0.249      | 0.249 | 0.206 | 0.277      | 0.247 | 0.204 | 0.123        | 0.125 | 0.121 |       |       |
|       | 1     |         |          | 0.235          | 0.246 | 0.205 | 0.263      | 0.244 | 0.205 | 0.298      | 0.247 | 0.206 | 0.129        | 0.130 | 0.124 |       |       |
|       | 2     |         |          | 0.257          | 0.244 | 0.206 | 0.301      | 0.245 | 0.205 | 0.331      | 0.246 | 0.205 | 0.134        | 0.137 | 0.128 |       |       |
| 0.5   | 0     |         |          | 0.228          | 0.252 | 0.205 | 0.252      | 0.250 | 0.205 | 0.288      | 0.254 | 0.206 | 0.126        | 0.126 | 0.122 |       |       |
|       | 1     |         |          | 0.239          | 0.249 | 0.209 | 0.269      | 0.252 | 0.205 | 0.306      | 0.252 | 0.208 | 0.131        | 0.132 | 0.126 |       |       |
|       | 2     |         |          | 0.260          | 0.245 | 0.207 | 0.307      | 0.244 | 0.208 | 0.344      | 0.252 | 0.208 | 0.136        | 0.138 | 0.130 |       |       |
| 0.1   | 0.5   |         |          | 0.0            | 0     | 0.273 | 0.247      | 0.204 | 0.245 | 0.247      | 0.202 | 0.224 | 0.244        | 0.204 | 0.187 | 0.186 | 0.186 |
|       |       |         |          |                | 1     | 0.278 | 0.245      | 0.202 | 0.247 | 0.249      | 0.204 | 0.225 | 0.242        | 0.204 | 0.184 | 0.171 | 0.167 |
|       |       |         |          |                | 2     | 0.299 | 0.243      | 0.207 | 0.255 | 0.240      | 0.202 | 0.229 | 0.241        | 0.203 | 0.196 | 0.157 | 0.157 |
|       |       | 0.3     | 0        | 0.269          | 0.246 | 0.205 | 0.246      | 0.245 | 0.203 | 0.224      | 0.243 | 0.204 | 0.180        | 0.180 | 0.177 |       |       |
|       |       |         | 1        | 0.277          | 0.244 | 0.204 | 0.245      | 0.244 | 0.207 | 0.224      | 0.245 | 0.207 | 0.181        | 0.168 | 0.162 |       |       |
|       |       |         | 2        | 0.302          | 0.241 | 0.204 | 0.257      | 0.245 | 0.204 | 0.227      | 0.244 | 0.204 | 0.189        | 0.156 | 0.154 |       |       |
|       |       | 0.5     | 0        | 0.273          | 0.247 | 0.206 | 0.243      | 0.245 | 0.207 | 0.224      | 0.244 | 0.208 | 0.177        | 0.175 | 0.172 |       |       |
|       |       |         | 1        | 0.275          | 0.244 | 0.205 | 0.243      | 0.243 | 0.205 | 0.226      | 0.241 | 0.206 | 0.179        | 0.166 | 0.161 |       |       |
|       |       |         | 2        | 0.299          | 0.241 | 0.206 | 0.259      | 0.240 | 0.206 | 0.229      | 0.242 | 0.206 | 0.184        | 0.155 | 0.153 |       |       |

NOTE: See the Note to Table S4.

Table S6. Empirical Bias of  $\hat{\beta}$  in Proportional Hazards Regression

| $p_0$ | $p_1$ | $\beta$ | $\gamma$ | High censoring rate |        |        |        |        |        | Moderate censoring rate |        |        |        |        |        |        |
|-------|-------|---------|----------|---------------------|--------|--------|--------|--------|--------|-------------------------|--------|--------|--------|--------|--------|--------|
|       |       |         |          | CC                  | SCC    | NCC    | CM     | YDS    | OPT    | CC                      | SCC    | ODS    | YDS    | OPT    |        |        |
| 0.7   | 0.7   | 0.0     | 0.0      | -0.005              | -0.003 | -0.003 | -0.002 | 0.000  | -0.003 | -0.003                  | -0.002 | 0.001  | 0.001  | 0.001  |        |        |
|       |       |         | 0.5      | 0.003               | 0.004  | 0.001  | -0.002 | 0.000  | -0.002 | -0.002                  | -0.003 | 0.000  | 0.001  | 0.001  |        |        |
|       |       |         | 1.0      | 0.003               | 0.006  | 0.003  | -0.003 | 0.001  | 0.000  | 0.000                   | -0.003 | 0.001  | 0.000  | 0.001  |        |        |
|       |       | 0.3     | 0.0      | 0.007               | 0.003  | 0.003  | 0.002  | 0.003  | 0.001  | 0.002                   | 0.003  | 0.003  | 0.002  | 0.004  | 0.004  |        |
|       |       |         | 0.5      | 0.001               | 0.005  | 0.001  | 0.001  | 0.003  | 0.002  | 0.000                   | 0.003  | 0.001  | 0.001  | 0.002  | 0.003  |        |
|       |       |         | 1.0      | -0.003              | -0.001 | 0.000  | -0.002 | 0.002  | 0.003  | 0.002                   | -0.001 | 0.002  | 0.001  | 0.001  | 0.003  |        |
|       |       | 0.5     | 0.0      | 0.007               | 0.007  | 0.003  | 0.004  | 0.005  | 0.002  | 0.002                   | 0.002  | 0.007  | -0.001 | 0.005  | 0.005  |        |
|       |       |         | 0.5      | 0.006               | 0.006  | 0.005  | 0.001  | 0.004  | 0.003  | 0.000                   | 0.006  | -0.002 | 0.004  | 0.004  |        |        |
|       |       |         | 1.0      | 0.006               | 0.005  | 0.004  | -0.001 | 0.002  | 0.004  | 0.002                   | 0.003  | -0.001 | 0.003  | 0.005  |        |        |
|       |       | 0.5     | 0.9      | 0.0                 | 0.0    | 0.003  | 0.003  | -0.001 | 0.004  | 0.002                   | 0.001  | -0.005 | 0.003  | -0.001 | 0.001  | 0.001  |
|       |       |         |          |                     | 0.5    | -0.001 | -0.002 | 0.000  | 0.002  | 0.000                   | 0.002  | 0.003  | 0.003  | -0.003 | 0.001  | 0.001  |
|       |       |         |          |                     | 1.0    | -0.003 | 0.002  | -0.005 | -0.001 | 0.001                   | 0.004  | -0.001 | 0.003  | 0.000  | 0.001  | 0.002  |
|       |       |         |          | 0.3                 | 0.0    | 0.001  | 0.004  | 0.000  | 0.006  | 0.005                   | 0.007  | 0.002  | 0.005  | 0.003  | 0.003  | 0.002  |
|       |       |         |          |                     | 0.5    | 0.004  | 0.004  | 0.005  | 0.004  | 0.004                   | 0.006  | 0.006  | 0.006  | 0.000  | 0.004  | 0.002  |
|       |       |         |          |                     | 1.0    | 0.003  | 0.009  | 0.005  | 0.001  | 0.003                   | 0.006  | 0.003  | 0.005  | 0.001  | 0.002  | 0.004  |
| 0.5   | 0.0   |         |          | 0.004               | 0.006  | 0.003  | 0.009  | 0.006  | 0.007  | 0.007                   | 0.007  | 0.003  | 0.004  | 0.004  | 0.003  |        |
|       | 0.5   |         |          | 0.007               | 0.007  | 0.004  | 0.006  | 0.007  | 0.007  | 0.008                   | 0.003  | 0.001  | 0.005  | 0.003  |        |        |
|       | 1.0   |         |          | 0.003               | 0.005  | 0.003  | 0.003  | 0.005  | 0.007  | 0.006                   | 0.004  | 0.003  | 0.005  | 0.005  |        |        |
| 0.1   | 0.5   |         |          | 0.0                 | 0.0    | 0.000  | 0.001  | -0.001 | 0.001  | -0.001                  | 0.001  | 0.003  | 0.000  | 0.000  | -0.003 | -0.001 |
|       |       |         |          |                     | 0.5    | 0.000  | -0.003 | -0.002 | -0.001 | -0.002                  | 0.000  | 0.002  | 0.003  | 0.002  | -0.004 | -0.002 |
|       |       |         |          |                     | 1.0    | 0.001  | -0.004 | 0.000  | -0.001 | -0.003                  | -0.001 | 0.001  | 0.005  | 0.002  | -0.002 | 0.000  |
|       |       |         |          | 0.3                 | 0.0    | -0.003 | 0.001  | 0.000  | 0.004  | 0.002                   | 0.003  | 0.004  | 0.004  | 0.002  | -0.002 | 0.000  |
|       |       |         |          |                     | 0.5    | 0.004  | 0.002  | 0.003  | 0.002  | 0.000                   | 0.002  | 0.003  | 0.004  | 0.003  | -0.002 | 0.000  |
|       |       |         |          |                     | 1.0    | 0.002  | -0.002 | -0.001 | 0.000  | -0.002                  | 0.000  | 0.000  | 0.003  | 0.003  | 0.000  | 0.001  |
|       |       | 0.5     | 0.0      | 0.014               | 0.015  | 0.011  | 0.005  | 0.003  | 0.005  | 0.004                   | 0.006  | 0.004  | 0.000  | 0.001  |        |        |
|       |       |         | 0.5      | 0.002               | 0.007  | 0.004  | 0.001  | 0.000  | 0.003  | 0.002                   | 0.003  | 0.003  | -0.001 | 0.000  |        |        |
|       |       |         | 1.0      | 0.003               | 0.003  | 0.004  | 0.000  | -0.001 | 0.002  | 0.003                   | 0.002  | 0.002  | 0.001  | 0.001  |        |        |

NOTE: CC, SCC, NCC, CM, ODS, YDS, and OPT denote case-cohort sampling, stratified case-cohort sampling, nested case-control sampling, counter-matching, general failure-time outcome-dependent sampling, Y-dependent sampling, and optimal design, respectively. Each entry is based on 10,000 replicates.

Table S7. Empirical Standard Error of  $\hat{\beta}$  in Proportional Hazards Regression

| $p_0$ | $p_1$ | $\beta$ | $\gamma$ | High censoring rate |       |       |       |       |       | Moderate censoring rate |       |       |       |       |       |       |
|-------|-------|---------|----------|---------------------|-------|-------|-------|-------|-------|-------------------------|-------|-------|-------|-------|-------|-------|
|       |       |         |          | CC                  | SCC   | NCC   | CM    | YDS   | OPT   | CC                      | SCC   | ODS   | YDS   | OPT   |       |       |
| 0.7   | 0.7   | 0.0     | 0.0      | 0.286               | 0.285 | 0.285 | 0.290 | 0.278 | 0.276 | 0.205                   | 0.203 | 0.206 | 0.176 | 0.175 |       |       |
|       |       |         | 0.5      | 0.250               | 0.247 | 0.248 | 0.256 | 0.240 | 0.237 | 0.199                   | 0.197 | 0.199 | 0.166 | 0.163 |       |       |
|       |       |         | 1.0      | 0.217               | 0.207 | 0.210 | 0.230 | 0.201 | 0.192 | 0.194                   | 0.187 | 0.193 | 0.154 | 0.139 |       |       |
|       |       | 0.3     | 0.0      | 0.268               | 0.264 | 0.264 | 0.268 | 0.257 | 0.255 | 0.208                   | 0.209 | 0.208 | 0.177 | 0.176 |       |       |
|       |       |         | 0.5      | 0.235               | 0.229 | 0.231 | 0.237 | 0.221 | 0.218 | 0.201                   | 0.199 | 0.201 | 0.164 | 0.161 |       |       |
|       |       |         | 1.0      | 0.197               | 0.191 | 0.193 | 0.211 | 0.186 | 0.178 | 0.193                   | 0.190 | 0.195 | 0.151 | 0.136 |       |       |
|       |       | 0.5     | 0.0      | 0.256               | 0.257 | 0.253 | 0.254 | 0.243 | 0.243 | 0.213                   | 0.212 | 0.215 | 0.178 | 0.178 |       |       |
|       |       |         | 0.5      | 0.220               | 0.219 | 0.219 | 0.224 | 0.210 | 0.207 | 0.204                   | 0.205 | 0.211 | 0.165 | 0.161 |       |       |
|       |       |         | 1.0      | 0.188               | 0.185 | 0.185 | 0.198 | 0.176 | 0.169 | 0.193                   | 0.189 | 0.200 | 0.150 | 0.135 |       |       |
|       |       | 0.5     | 0.9      | 0.0                 | 0.0   | 0.322 | 0.324 | 0.317 | 0.316 | 0.309                   | 0.296 | 0.226 | 0.228 | 0.229 | 0.195 | 0.178 |
|       |       |         |          |                     | 0.5   | 0.287 | 0.293 | 0.283 | 0.283 | 0.276                   | 0.271 | 0.229 | 0.223 | 0.232 | 0.194 | 0.176 |
|       |       |         |          |                     | 1.0   | 0.256 | 0.261 | 0.253 | 0.257 | 0.242                   | 0.239 | 0.232 | 0.218 | 0.233 | 0.189 | 0.172 |
| 0.3   | 0.0   |         |          | 0.292               | 0.297 | 0.289 | 0.289 | 0.281 | 0.270 | 0.227                   | 0.224 | 0.229 | 0.194 | 0.172 |       |       |
|       | 0.5   |         |          | 0.268               | 0.274 | 0.262 | 0.259 | 0.251 | 0.250 | 0.233                   | 0.222 | 0.233 | 0.191 | 0.170 |       |       |
|       | 1.0   |         |          | 0.236               | 0.242 | 0.232 | 0.236 | 0.220 | 0.220 | 0.229                   | 0.215 | 0.235 | 0.187 | 0.169 |       |       |
| 0.5   | 0.0   |         |          | 0.278               | 0.282 | 0.277 | 0.272 | 0.264 | 0.257 | 0.233                   | 0.225 | 0.235 | 0.193 | 0.169 |       |       |
|       | 0.5   |         |          | 0.251               | 0.260 | 0.246 | 0.244 | 0.237 | 0.237 | 0.236                   | 0.222 | 0.239 | 0.192 | 0.167 |       |       |
|       | 1.0   |         |          | 0.222               | 0.230 | 0.220 | 0.224 | 0.208 | 0.210 | 0.231                   | 0.214 | 0.239 | 0.188 | 0.168 |       |       |
| 0.1   | 0.5   |         |          | 0.0                 | 0.0   | 0.319 | 0.324 | 0.317 | 0.320 | 0.310                   | 0.298 | 0.226 | 0.226 | 0.231 | 0.198 | 0.180 |
|       |       |         |          |                     | 0.5   | 0.271 | 0.264 | 0.268 | 0.280 | 0.260                   | 0.241 | 0.214 | 0.217 | 0.221 | 0.178 | 0.157 |
|       |       |         |          |                     | 1.0   | 0.226 | 0.205 | 0.220 | 0.249 | 0.211                   | 0.189 | 0.200 | 0.204 | 0.208 | 0.156 | 0.131 |
|       |       | 0.3     | 0.0      | 0.296               | 0.294 | 0.298 | 0.299 | 0.288 | 0.278 | 0.221                   | 0.219 | 0.226 | 0.188 | 0.174 |       |       |
|       |       |         | 0.5      | 0.251               | 0.243 | 0.246 | 0.261 | 0.240 | 0.223 | 0.205                   | 0.207 | 0.217 | 0.168 | 0.149 |       |       |
|       |       |         | 1.0      | 0.210               | 0.192 | 0.205 | 0.233 | 0.194 | 0.175 | 0.195                   | 0.195 | 0.201 | 0.146 | 0.123 |       |       |
|       |       | 0.5     | 0.0      | 0.288               | 0.284 | 0.283 | 0.285 | 0.274 | 0.266 | 0.215                   | 0.219 | 0.223 | 0.182 | 0.170 |       |       |
|       |       |         | 0.5      | 0.241               | 0.231 | 0.236 | 0.249 | 0.226 | 0.213 | 0.204                   | 0.204 | 0.214 | 0.162 | 0.145 |       |       |
|       |       |         | 1.0      | 0.200               | 0.185 | 0.194 | 0.222 | 0.184 | 0.167 | 0.187                   | 0.187 | 0.195 | 0.142 | 0.120 |       |       |

NOTE: See the Note to Table S6.
